# Supplementary material for: Integration of proteomic and transcriptomic profiles identifies a novel PDGF-MYC network in human smooth muscle cells
Source: PubMed Central journal article supplement (PMC4422302; doi:10.1186/s12964-014-0044-z), 2014-08-01
Supplement: s12964-014-0044-z-S7.pdf [file s12964-014-0044-z-S7.pdf]

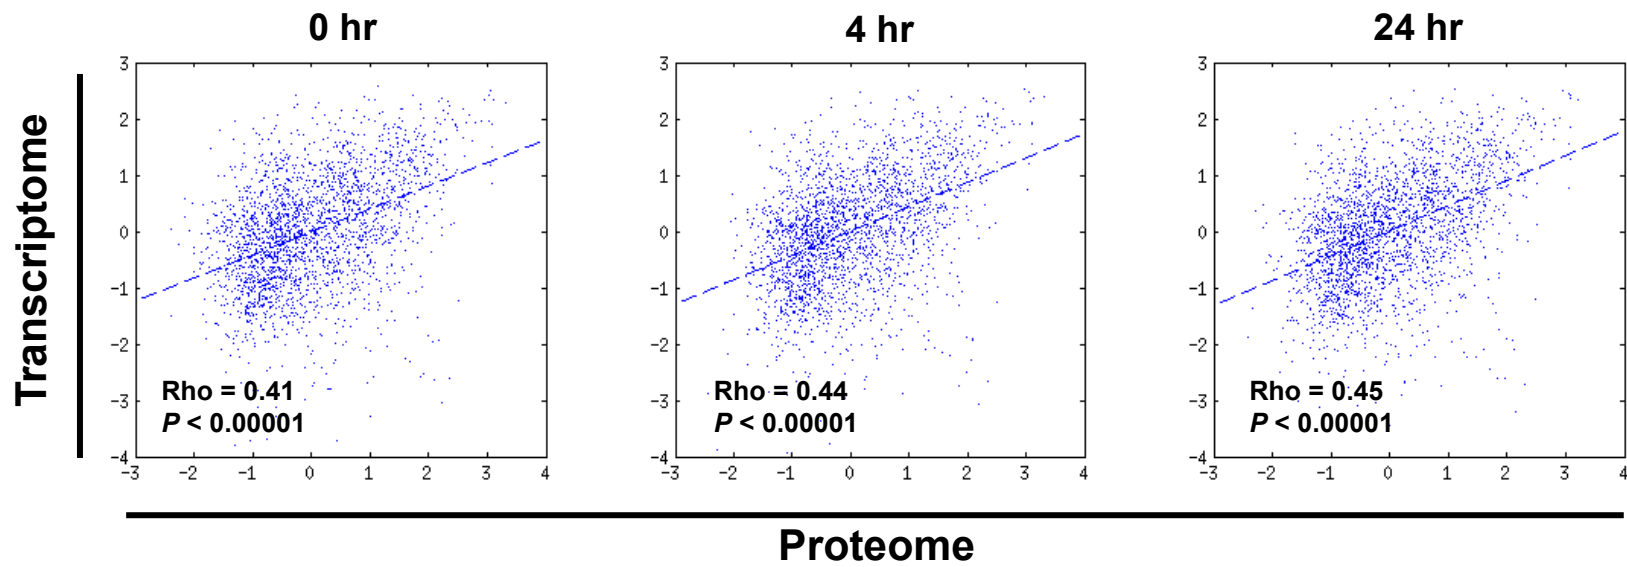

Figure S5
